# Supplementary material for: Peginterferon Alfa-2b or Alfa-2a with Ribavirin for Treatment of Hepatitis C Infection
Source: Atypon-hosted journal article supplement (doi:10.1056/nejmoa0808010), 2009-07-23
Supplement: nejm_mchutchison_580sa1.pdf [file nejm_mchutchison_580sa1.pdf]

## Supplementary Appendix

This appendix has been provided by the authors to give readers additional information about their work.

Supplement to: McHutchison JG, Lawitz EJ, Shiffman ML, et al. Peginterferon alfa-2b or alfa-2a with ribavirin for treatment of hepatitis C infection. *N Engl J Med* 2009;361:580-93. DOI: 10.1056/NEJMoa0808010.

## Appendix Table 1

### A: Final Logistic Regression Model\* for SVR Status Using Stepwise Variable Selection<sup>&</sup> Population: Randomized Patients Who Received at Least One Dose of Study Medication

| Effect                                             | Odds Ratio | 95% CI      | P - Value |
|----------------------------------------------------|------------|-------------|-----------|
| METAVIR Fibrosis ( F0/1/2 vs F3/4)                 | 2.163      | 1.627-2.874 | <.001     |
| Baseline viral load (IU/mL, ≤ 600,000 vs >600,000) | 3.319      | 2.688-4.099 | <.001     |
| Race ( Caucasian vs African American)              | 3.039      | 2.396-3.855 | <.001     |
| Hepatic steatosis (No: 0% vs Yes: >0%)             | 1.608      | 1.358-1.903 | <.001     |
| Baseline fasting glucose (mmol/L, <5.6 vs ≥ 5.6)   | 1.428      | 1.185-1.721 | <.001     |
| ALT ( Elevated vs Normal)                          | 1.332      | 1.080-1.644 | 0.007     |

### B: Final Logistic Regression Model\* for Relapse Status Using Stepwise Variable Selection<sup>&</sup> Population: Patients Who Were HCV-RNA Negative at End of Treatment and Whose End of Follow-Up Evaluation Was Not Missing

| Effect                                             | Odds Ratio | 95% CI        | P - Value |
|----------------------------------------------------|------------|---------------|-----------|
| Treatment ( Peg2b 1.0/RBV vs Peg2a/RBV)            | 0.592      | 0.436 - 0.803 | <0.001    |
| Treatment ( Peg2b 1.5/RBV vs Peg2a/RBV)            | 0.713      | 0.534 - 0.951 | 0.02      |
| METAVIR Fibrosis ( F3/4 vs F0/1/2)                 | 1.956      | 1.307 - 2.928 | 0.001     |
| Baseline viral load (IU/mL, >600,000 vs ≤ 600,000) | 2.633      | 1.872 - 3.705 | <0.001    |
| Age(Years, >40 vs ≤ 40)                            | 2.053      | 1.368 - 3.080 | <0.001    |
| Hepatic steatosis (Yes: >0% vs No: 0%)             | 1.477      | 1.136 - 1.920 | 0.004     |
| Baseline fasting glucose (mmol/L, ≥ 5.6 vs <5.6)   | 1.554      | 1.185 - 2.039 | 0.002     |
| ALT (Normal vs Elevated)                           | 1.469      | 1.073 - 2.012 | 0.02      |

\*Potential predictors included the following pre-specified factors: treatment regimen (Peg2b 1.0/RBV, Peg2b 1.5/RBV, Peg2a/RBV), METAVIR fibrosis ( F0/1/2, F3/4), baseline viral load (IU/mL, ≤ 600,000, >600,000), age(years, ≤ 40, >40), gender (Male, Female), race (Caucasian, African American), hepatic steatosis (No: 0%, Yes: >0%), BMI (≤ 20, >20-25, >25-30, >30), ALT( Elevated , Normal), smoking status (Current, Former, Never), baseline genotype(1A, 1B), assigned ribavirin dose(mg/kg/day, continuous)<sup>§</sup>, baseline weight (kg, continuous)<sup>§</sup>, as well as the following three post-hoc factors: baseline fasting glucose (mmol/L, <5.6, ≥ 5.6), baseline hemoglobin (g/dL, continuous)<sup>§</sup>, and baseline platelet count (continuous)<sup>§</sup>.

<sup>&</sup> Model selection: stepwise selection procedure used a significance level of 0.05 for variables to both enter and stay in the final model.

<sup>§</sup>All continuous variables (baseline hemoglobin, baseline platelet count, assigned ribavirin dose, and baseline weight) were standardized as: (variable value – mean)/Standard Deviation.

**Appendix Table 2: P-Values<sup>[1]</sup> for Treatment by Subgroup Interactions and Other Model Effects for Subgroups Based on Patient Characteristics at Baseline**

| Subgroup/Effect                                            | Treatment Effect Specification (Pairwise) <sup>[2]</sup> |                     |                     |
|------------------------------------------------------------|----------------------------------------------------------|---------------------|---------------------|
|                                                            | (Peg2b 1.0, Peg2b 1.5)                                   | (Peg 2b1.5, Peg 2a) | (Peg2b 1.0, Peg 2a) |
| <u>METAVIR Fibrosis ( 0/1/2, 3/4)</u>                      |                                                          |                     |                     |
| Treatment                                                  | 0.29                                                     | 0.50                | 0.71                |
| Subgroup                                                   | <0.001                                                   | <0.001              | <0.001              |
| Treatment*Subgroup                                         | 0.06                                                     | 0.75                | 0.11                |
| <u>Baseline viral load (IU/mL, &gt;600,000, ≤ 600,000)</u> |                                                          |                     |                     |
| Treatment                                                  | 0.47                                                     | 0.35                | 0.10                |
| Subgroup                                                   | <0.001                                                   | <0.001              | <0.001              |
| Treatment*Subgroup                                         | 0.99                                                     | 0.41                | 0.40                |
| <u>Race (African American, Caucasian)</u>                  |                                                          |                     |                     |
| Treatment                                                  | 0.12                                                     | 0.44                | 0.02                |
| Subgroup                                                   | <0.001                                                   | <0.001              | <0.001              |
| Treatment*Subgroup                                         | 0.18                                                     | 0.62                | 0.06                |
| <u>Age (Years, ≤ 40, &gt;40)</u>                           |                                                          |                     |                     |
| Treatment                                                  | 0.23                                                     | 0.60                | 0.08                |
| Subgroup                                                   | <0.001                                                   | <0.001              | <0.001              |
| Treatment*Subgroup                                         | 0.46                                                     | 0.67                | 0.23                |
| <u>Gender (Male, Female)</u>                               |                                                          |                     |                     |
| Treatment                                                  | 0.19                                                     | 0.83                | 0.12                |
| Subgroup                                                   | 0.38                                                     | 0.04                | 0.70                |
| Treatment*Subgroup                                         | 0.01                                                     | 0.20                | 0.23                |
| <u>Hepatic steatosis (No, Yes)</u>                         |                                                          |                     |                     |
| Treatment                                                  | 0.50                                                     | 0.41                | 0.14                |
| Subgroup                                                   | <0.001                                                   | <0.001              | <0.001              |
| Treatment*Subgroup                                         | 0.88                                                     | 0.94                | 0.94                |
| <u>BMI (≤ 20, &gt;20-25, &gt;25-30, &gt;30)</u>            |                                                          |                     |                     |
| Treatment                                                  | 0.80                                                     | 0.42                | 0.27                |
| Subgroup                                                   | 0.87                                                     | 0.76                | 0.26                |
| Treatment*Subgroup                                         | 0.18                                                     | 0.16                | 0.97                |
| <u>ALT (Normal, Elevated)</u>                              |                                                          |                     |                     |
| Treatment                                                  | 0.88                                                     | 0.36                | 0.44                |
| Subgroup                                                   | 0.04                                                     | 0.01                | 0.24                |
| Treatment*Subgroup                                         | 0.20                                                     | 0.37                | 0.68                |

|                                                          |        |        |        |
|----------------------------------------------------------|--------|--------|--------|
| <u>Smoking status (Current, Former, Never)</u>           |        |        |        |
| Treatment                                                | 0.47   | 0.60   | 0.21   |
| Subgroup                                                 | 0.45   | 0.17   | 0.94   |
| Treatment*Subgroup                                       | 0.13   | 0.29   | 0.70   |
| <u>Baseline fasting glucose (mmol/L, &lt;5.6, ≥ 5.6)</u> |        |        |        |
| Treatment                                                | 0.51   | 0.43   | 0.15   |
| Subgroup                                                 | <0.001 | <0.001 | <0.001 |
| Treatment*Subgroup                                       | 0.98   | 0.53   | 0.55   |
| <u>Baseline genotype (1a, 1b)</u>                        |        |        |        |
| Treatment                                                | 0.97   | 0.97   | 0.97   |
| Subgroup                                                 | 0.86   | 0.46   | 0.41   |
| Treatment*Subgroup                                       | 0.92   | 0.66   | 0.84   |
| <u>Baseline weight (kg, continuous)</u>                  |        |        |        |
| Treatment                                                | 0.81   | 0.36   | 0.25   |
| Subgroup                                                 | 0.51   | 0.11   | 0.14   |
| Treatment* Subgroup                                      | 0.94   | 0.39   | 0.36   |
| <u>Hemoglobin (g/dL, continuous)</u>                     |        |        |        |
| Treatment                                                | 0.52   | 0.47   | 0.18   |
| Subgroup                                                 | 0.61   | 0.07   | 0.23   |
| Treatment * Subgroup                                     | 0.57   | 0.50   | 0.21   |
| <u>Platelet count (continuous)</u>                       |        |        |        |
| Treatment                                                | 0.28   | 0.87   | 0.36   |
| Subgroup                                                 | 0.006  | <0.001 | 0.006  |
| Treatment*Subgroup                                       | 0.17   | 0.99   | 0.17   |
| <u>Assigned ribavirin dose (mg/kg/day, continuous)</u>   |        |        |        |
| Treatment                                                | 0.52   | 0.88   | 0.34   |
| Subgroup                                                 | 0.01   | 0.03   | 0.003  |
| Treatment* Subgroup                                      | 0.57   | 0.84   | 0.36   |

[1] Table entries are the nominal p-values for the corresponding model effect, obtained from a logistic regression model with SVR status as the dependent variable and treatment, subgroup, and the treatment by subgroup interaction as independent variables.

[2] Treatment effect is a variable with two levels which correspond to the two treatment regimens specified in the column heading.
